# Supplementary material for: The impact of genome variation and diet on the metabolic phenotype and microbiome composition of Drosophila melanogaster
Source: PubMed Central journal article supplement (PMC5906449; doi:10.1038/s41598-018-24542-5), 2018-04-18
Supplement: 41598_2018_24542_MOESM1_ESM.pdf [file 41598_2018_24542_MOESM1_ESM.pdf]

1 **Supplemental data for the manuscript**

2  
3 ***The impact of genome variation and diet on the metabolic phenotype and microbiome***  
4 ***composition of *Drosophila melanogaster****

5  
6 **Authored by: Lisa Jehrke, Fiona A. Stewart, Andrea Droste and Mathias Beller**

7  
8 The Supplemental data comprises one Excel Workbook with all primary data and eight  
9 figures and the associated legends.

10  
11 Fig. S1: Metabolic measurements of late third instar larvae under basal conditions.  
12 Triglyceride (TAG), glycerol, glycogen and lactate, measurements are shown. The data  
13 represent mean values  $\pm$  standard deviation for triplicate samples. The metabolic  
14 measurements are normalized to the number of animals per sample (n=5) and ordered from  
15 lowest to highest value. The full dataset can be found in Supplemental Table, sheet A.

16  
17 Fig. S2: Metabolic measurements of six day old adult flies (males and females) under basal  
18 conditions. Triglyceride, glycerol, glucose, glycogen, lactate and citrate synthase activity are  
19 shown. The data represent mean values  $\pm$  standard deviation for triplicate (for citrate  
20 synthase activity only unique) samples. The metabolic measurements are normalized to the  
21 number of animals per sample (n=8) and ordered from lowest to highest value of the female  
22 flies. The full dataset can be found in Supplemental Table, sheet A.

23  
24 Fig. S3: Identification of sub-metabotypes within the larval metabolic cohort and loading plot  
25 of the Principal Component Analysis shown in Figure 2B. (A) K-means analysis of the larval  
26 metabolic data. (B) Heatmap showing the results from k-means clustering in (A) with six

27 metabotypes. Color coding represents the column-wise z-score normalized metabolite  
28 measurements. Each row represents a fly line from the DGRP subset and the columns  
29 represent the metabolic measurements normalized per animal. (C) Bar plot representation  
30 showing the interconnecting between the six sub-metabotypes (M1 to M6) of the larvae and  
31 the developmental groups (D1 to D5) of the DGRP flies. The representation shows the per  
32 cent values of fly lines with a specific developmental timing that group in a sub-metabotype  
33 of the larvae. (D) Loading plot of the PCA shown in Fig. 2B. The loading plot provides  
34 information concerning the contribution of the different measurements performed to the  
35 principal components 1 and 2.

36  
37 Fig. S4: Box plots summarizing the protein and metabolite measurements of the six day old  
38 adult flies (female and male), which were either kept constantly on a low sugar diet or shifted  
39 from a low sugar diet to a standard, or a high sugar diet. Averaged data points from the  
40 triplicate measurements available for glucose (A), TAG (B), glycogen (C), total protein (D),  
41 and (E) glycerol measurements from all 35 female (light grey) and male (dark grey) DGRP  
42 fly lines. All data were normalized to the number of animals per sample. The data refer to  
43 the scheme shown in Figure 3A. The full dataset can be found in Supplemental Table, sheet  
44 E.

45  
46 Fig. S5: DGRP line-specific response to the diet switch conditions. The dumbbell plots depict  
47 the responses of the 35 DGRP lines (males and females) to the diet shift from LSD (blue) to  
48 HSD (orange) in different metabolic traits. (A) TAG changes from female flies, (B) TAG  
49 changes from male flies, (C) glycerol changes from female flies and (D) glycerol changes  
50 from male flies. The values are normalized to the highest LSD value of the respective  
51 metabolite. The data relate to scheme shown in Figure 3A. The full dataset can be found in  
52 Supplemental Table, sheet F.

53  
54 Fig. S6: Metabolic phenotype of DGRP lines 301, 303, 315, and 859 used for the microbiome  
55 sequencing experiments. (A) Principle component analysis of the z-score normalized  
56 metabolic measurements. (B) Radar plot depicting the z-score normalized metabolic  
57 measurements for the four DGRP fly lines. The color code is provided in the legend. Both  
58 the PCA as well as the radar plot demonstrates a high diversification of the four fly lines  
59 based on their respective profiles.

60  
61 Fig. S7: Radar plots depicting the metabolic changes following the diet switch of the DGRP  
62 lines 301, 303, 315, and 859 used for the microbiome sequencing experiments. Results for  
63 each line are shown in a separate radar plot. All fly lines showed metabolic changes in  
64 response to the dietary shift from the low sugar diet to either the standard or high sugar diet.  
65 Numerical code: 1 – TAG (LSD to SD) male; 2 – TAG (LSD to HSD) male; 3 – glycerol (LSD  
66 to SD) male; 4 – glycerol (LSD to HSD) male; 5 – glycogen (LSD to SD) male; 6 – glycogen  
67 (LSD to HSD) male; 7 – glucose (LSD to SD) male; 8 – glucose (LSD to HSD) male; 9 –  
68 TAG (LSD to SD) female; 10 – TAG (LSD to HSD) female; 11 – glycerol (LSD to SD) female;  
69 12 – glycerol (LSD to HSD) female; 13 – glycogen (LSD to SD) female; 14 – glycogen (LSD  
70 to HSD) female; 15 – glucose (LSD to SD) female; 16 – glucose (LSD to HSD) female.

71  
72 Fig. S8: Correlation between metabolic parameters and the gut microbiome. (A) Scatter  
73 plots of selected correlations from the correlation matrix shown in Fig. 6A. The linear  
74 approximation and the confidence interval as well as the r values are shown. (B) Correlation  
75 matrix of significant correlations ( $p < 0.05$ ) between the indicated metabolic parameters  
76 measured under basal nutritional conditions and their corresponding microbiome species  
77 abundancies. The color code and size of the circles are proportional to the r correlation  
78 coefficient and the p-value. (C) Scatter plots of selected correlations from the correlation

79 matrix shown in (B). The linear approximation and the confidence interval as well as the r  
80 values are shown.

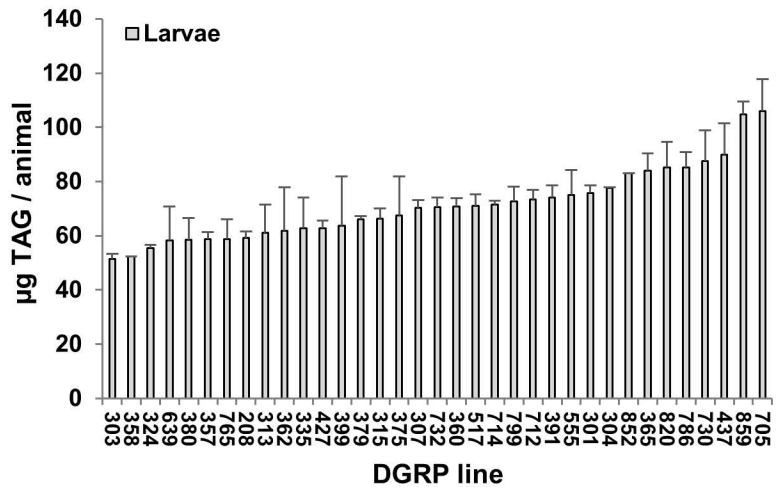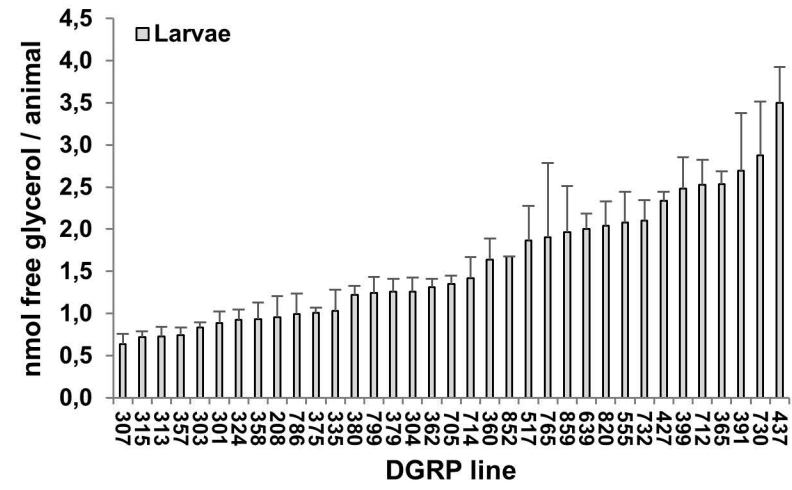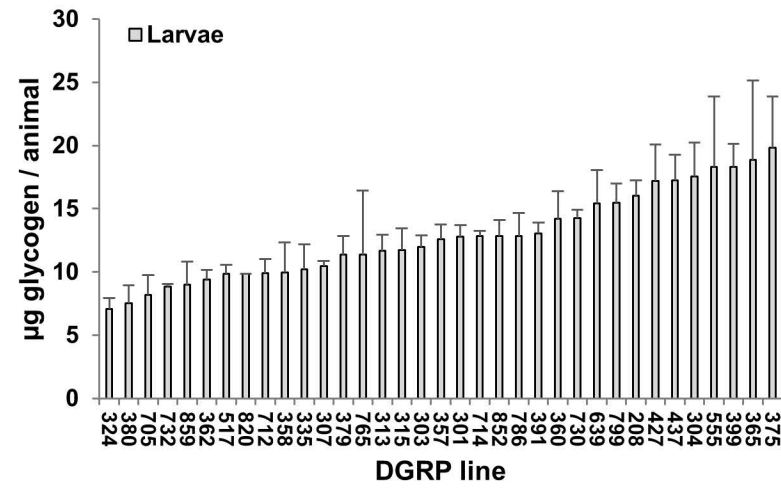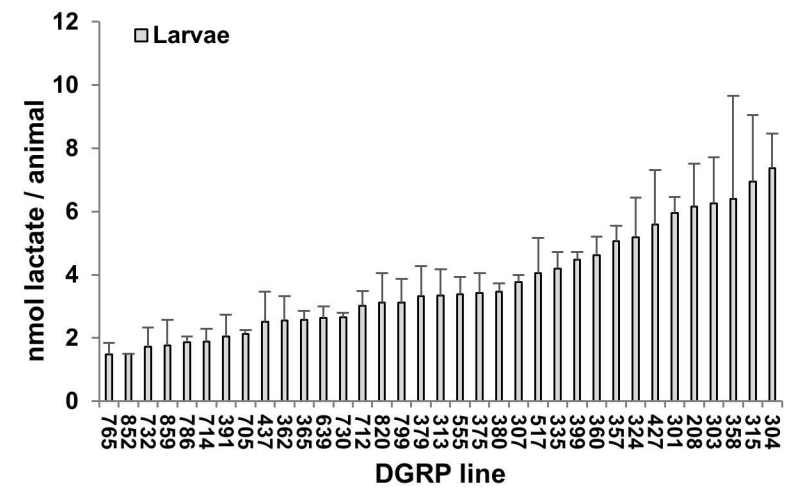

**Fig. S1**

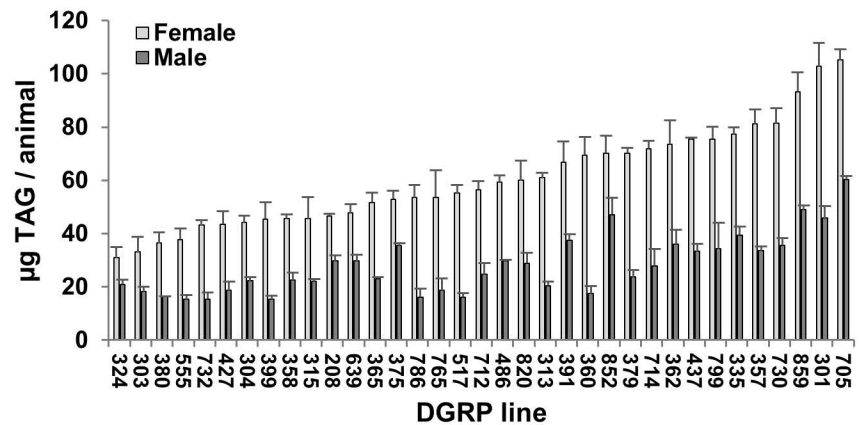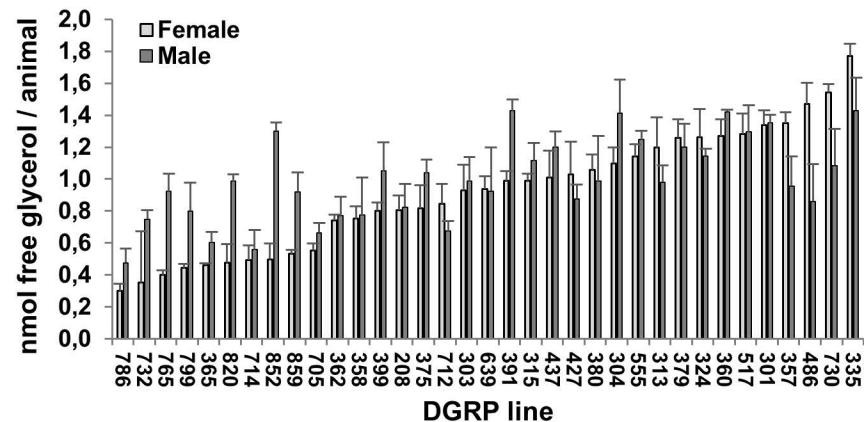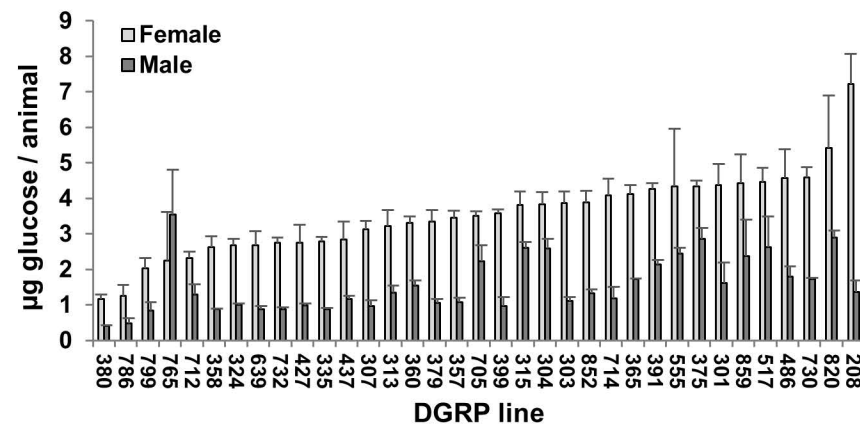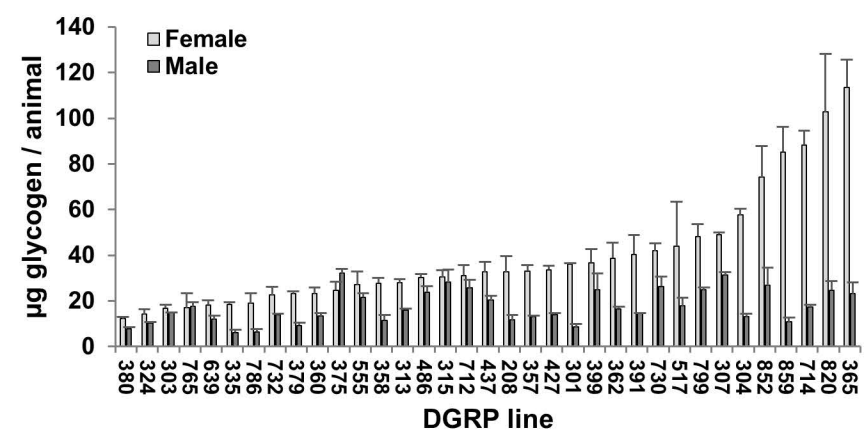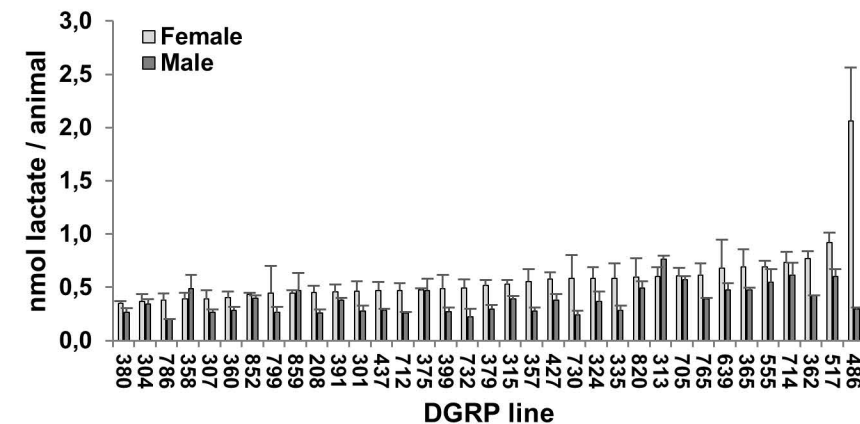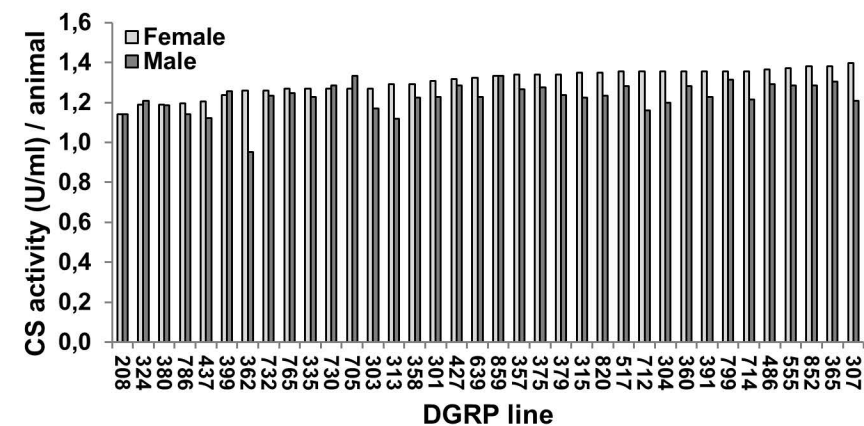

Fig. S2

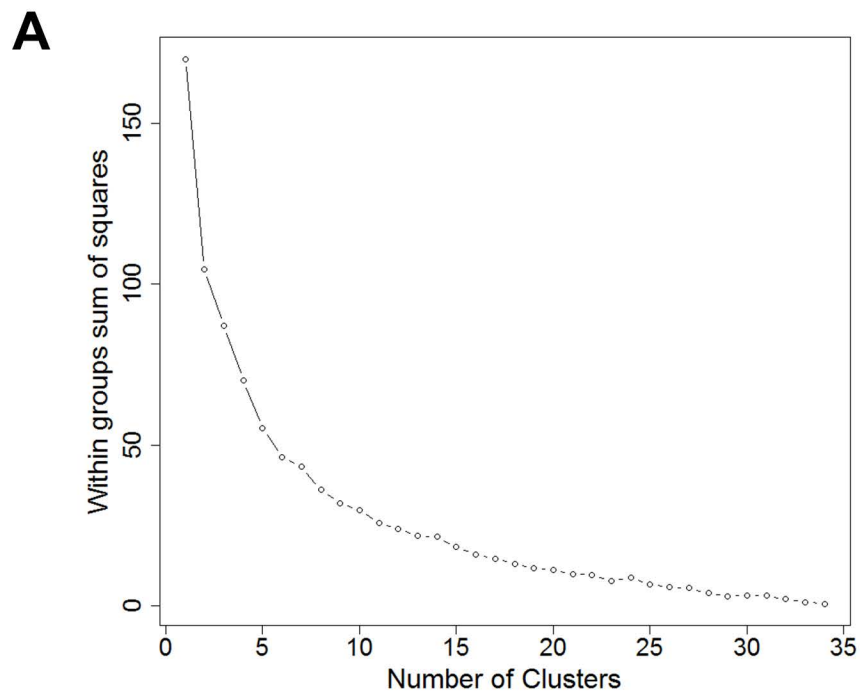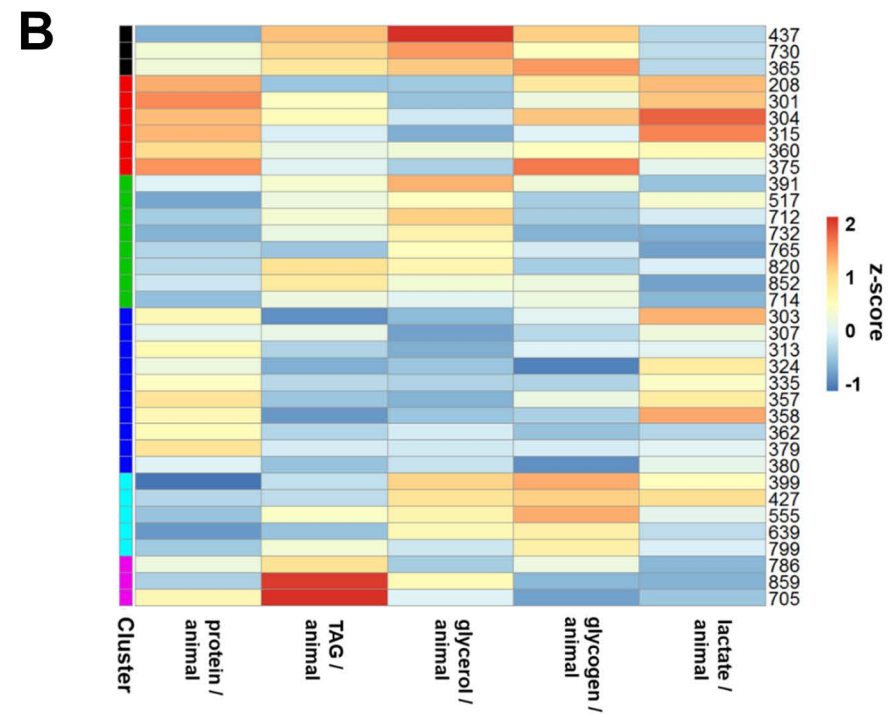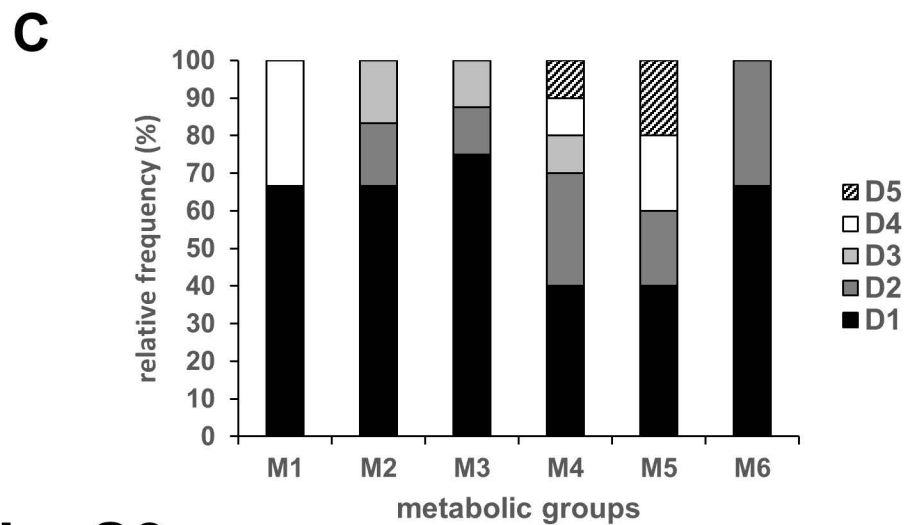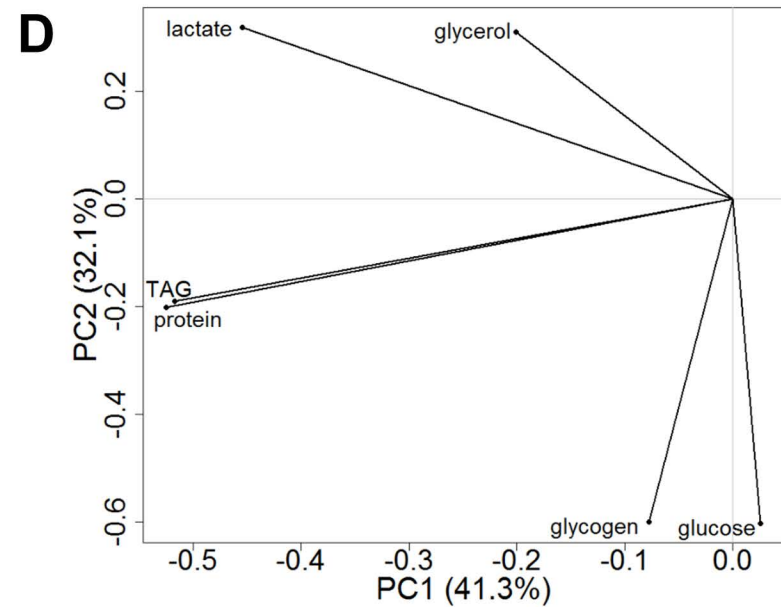

**Fig. S3**

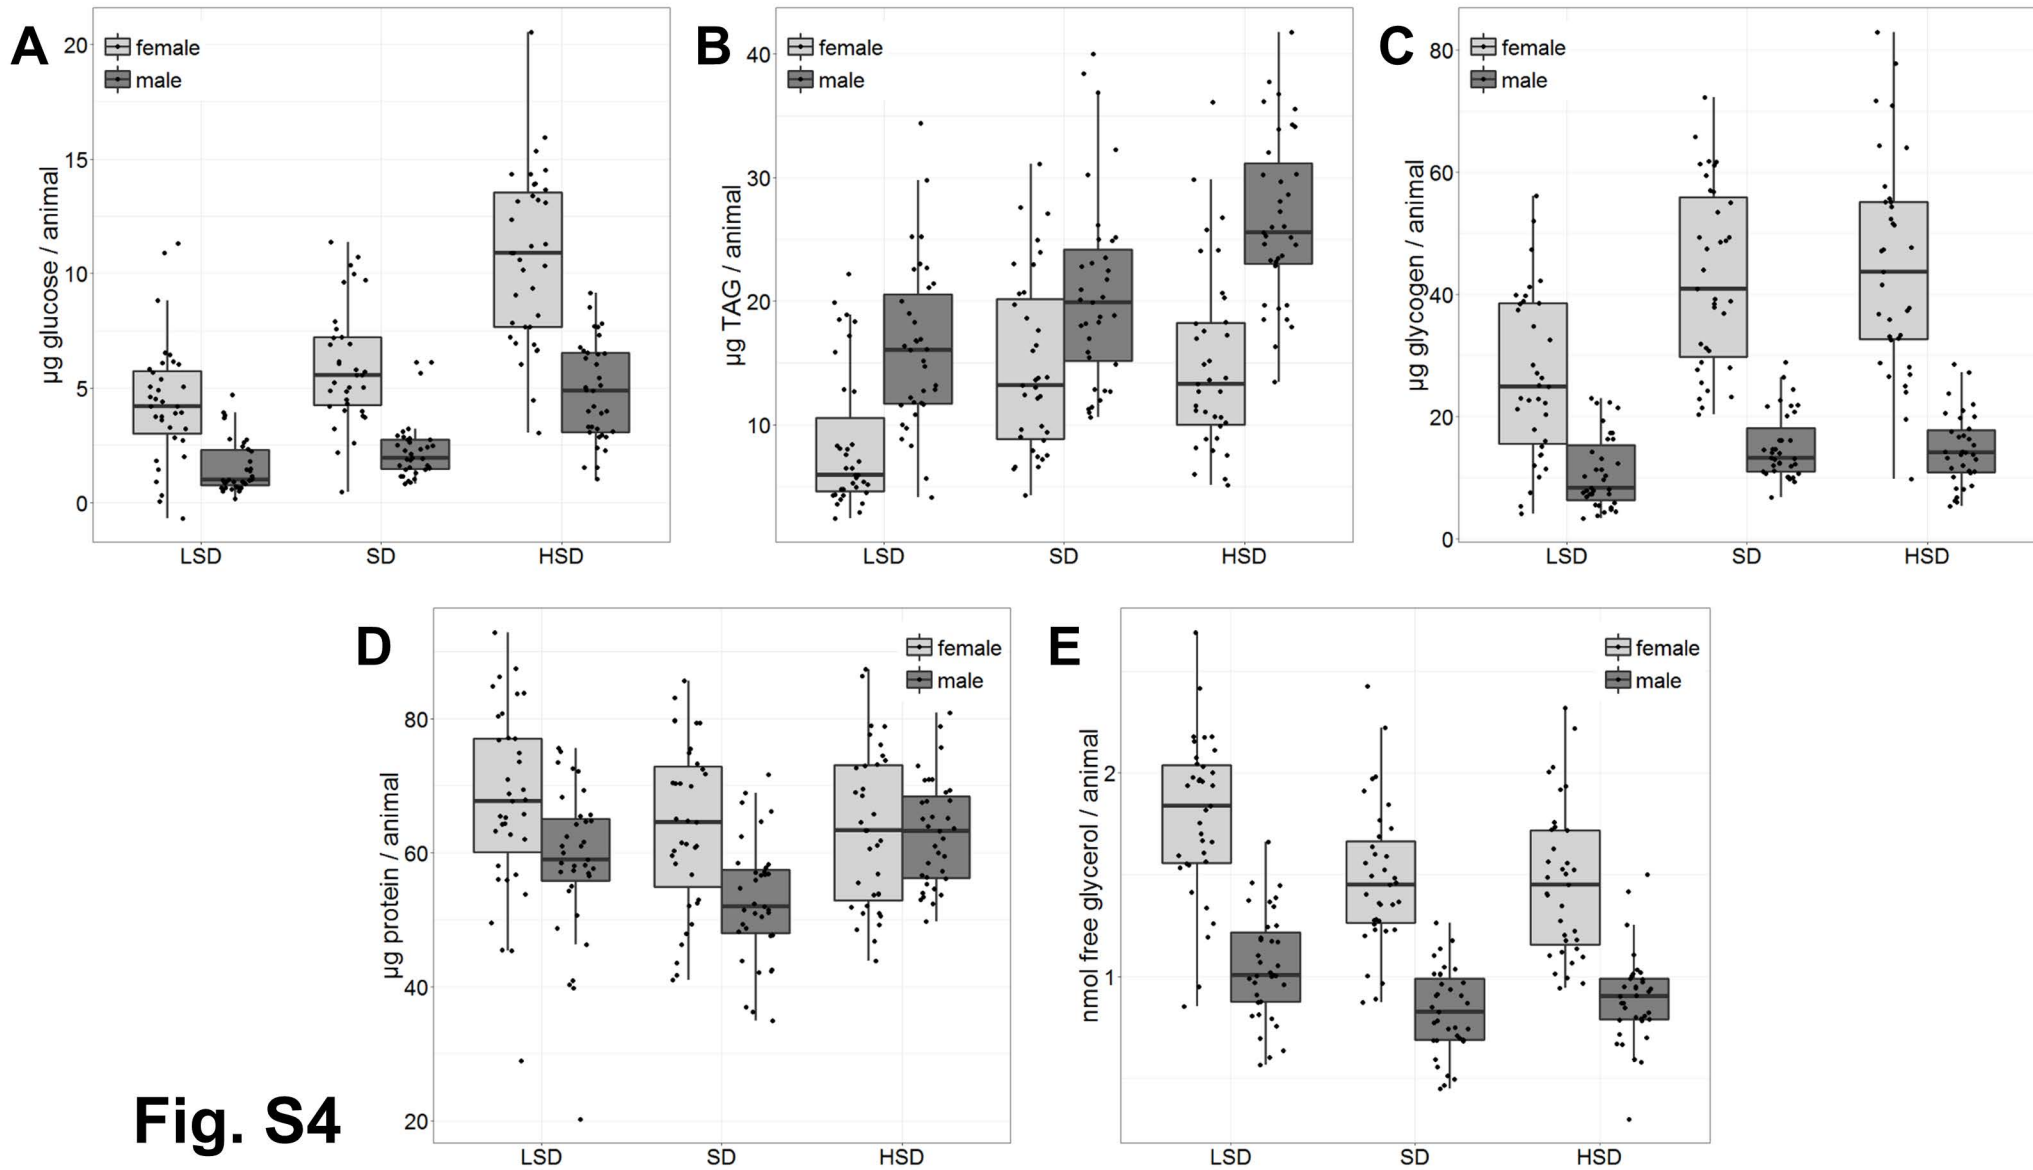

**Fig. S4**



**A**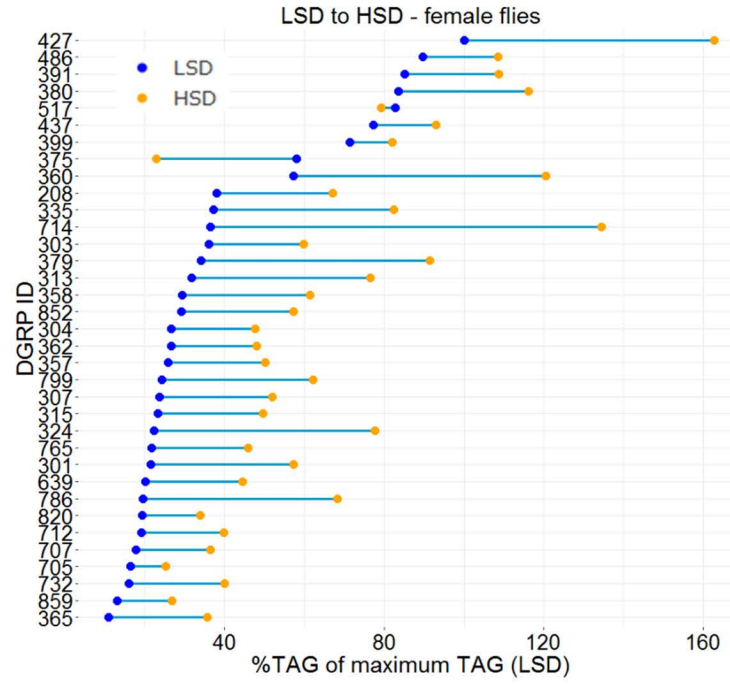**B**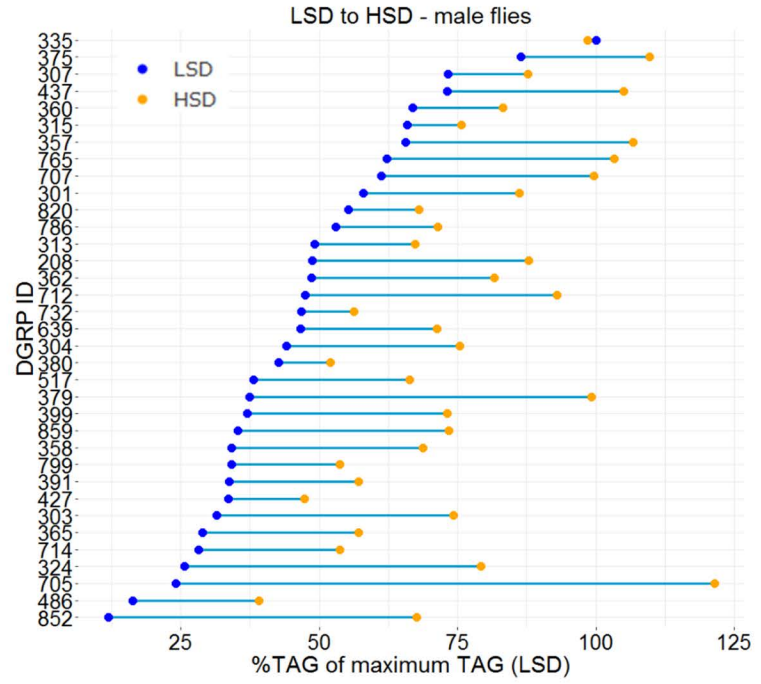**C**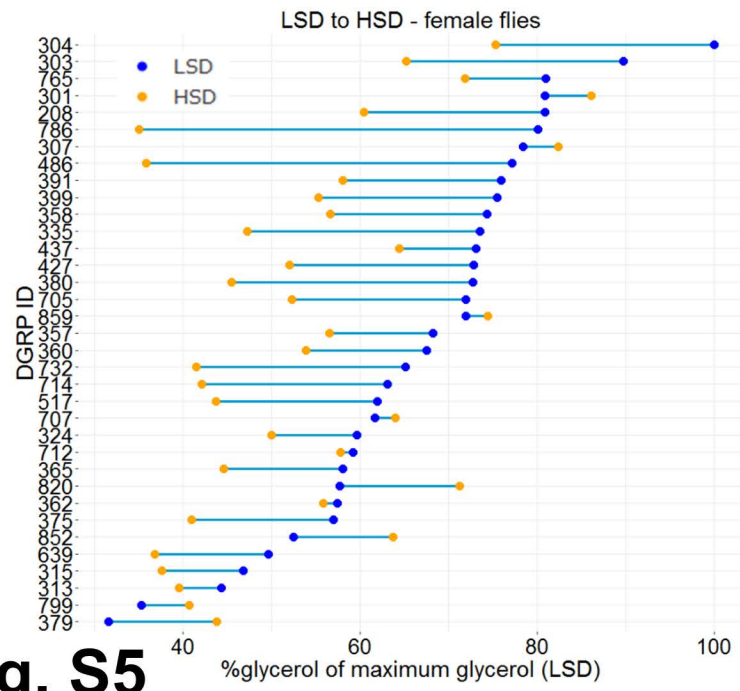**D**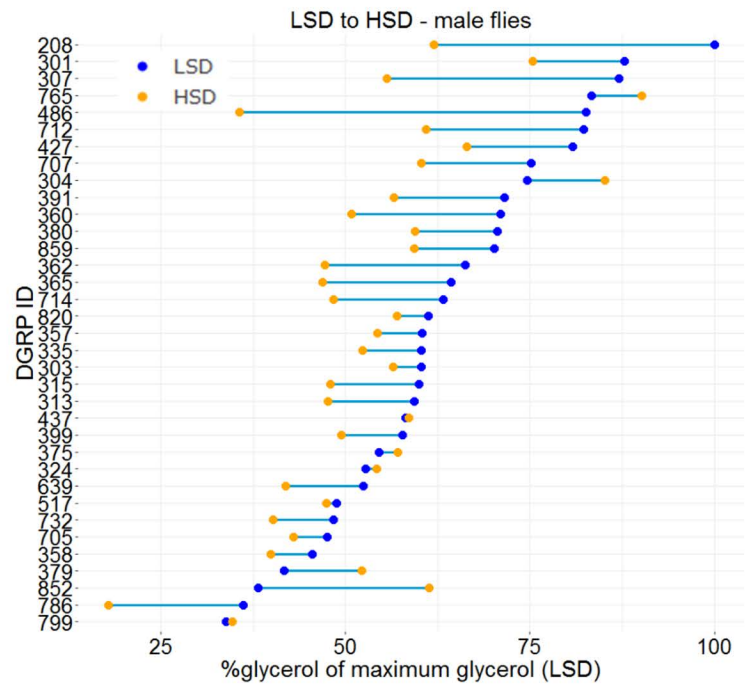**Fig. S5**

**A**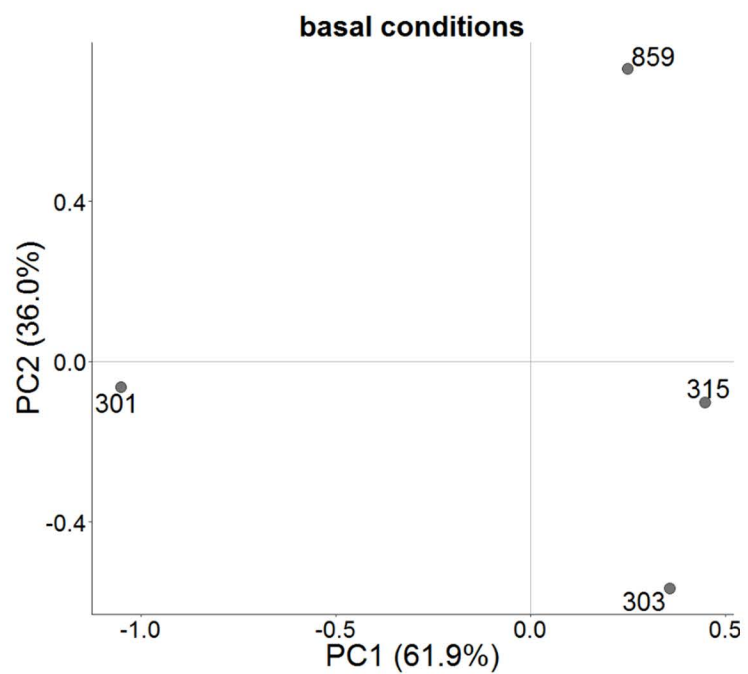**B**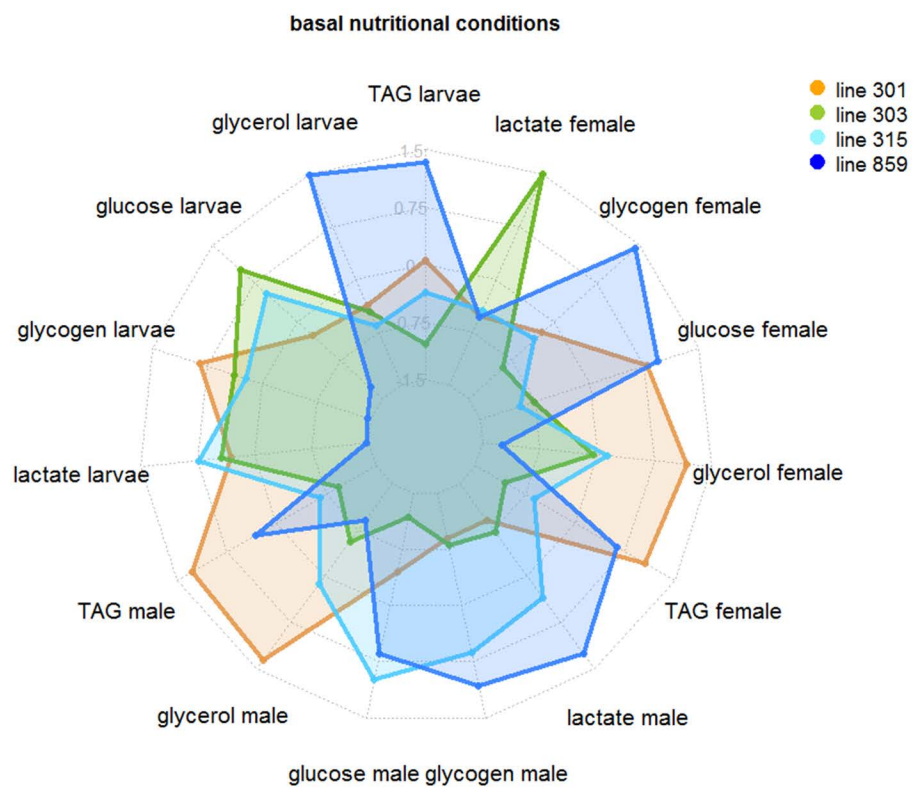**Fig. S6**

**Line 301**

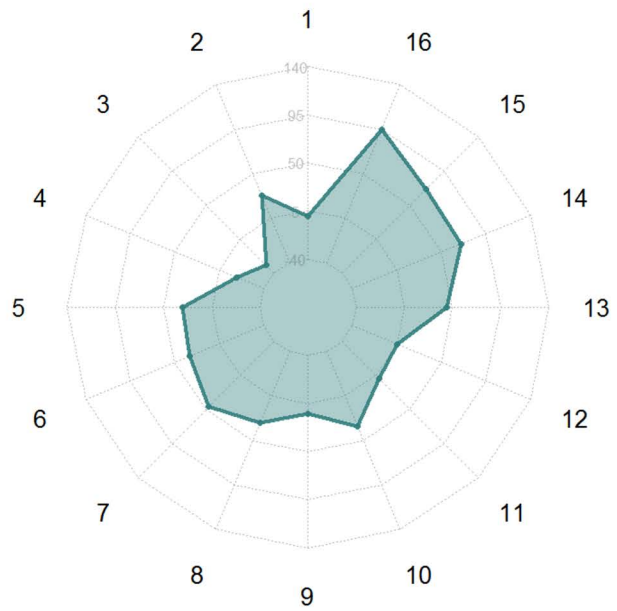

**Line 303**

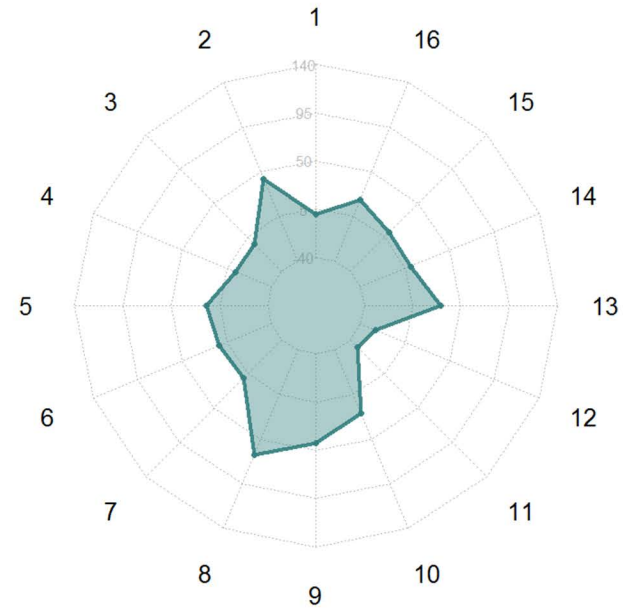

**Line 315**

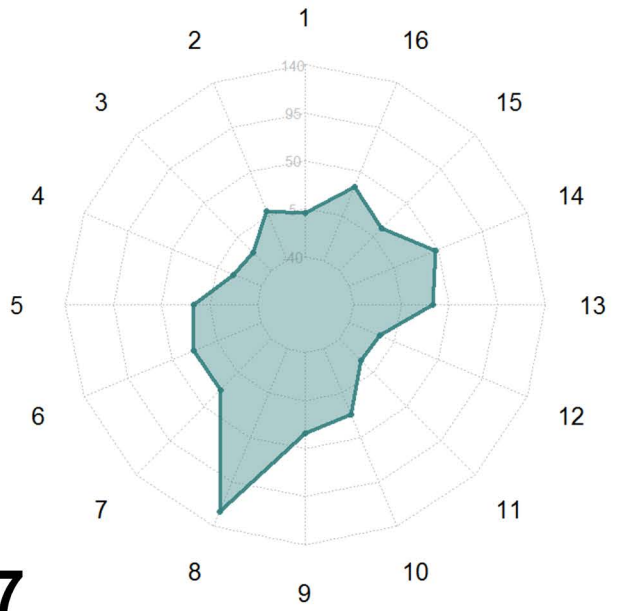

**Line 859**

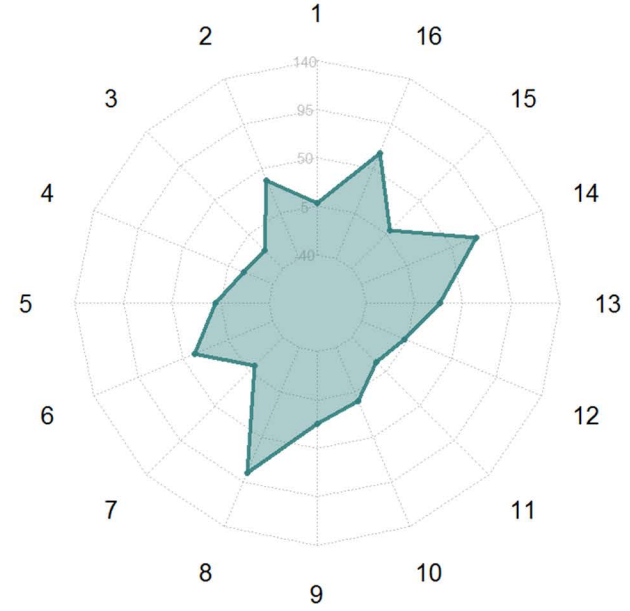

**Fig. S7**

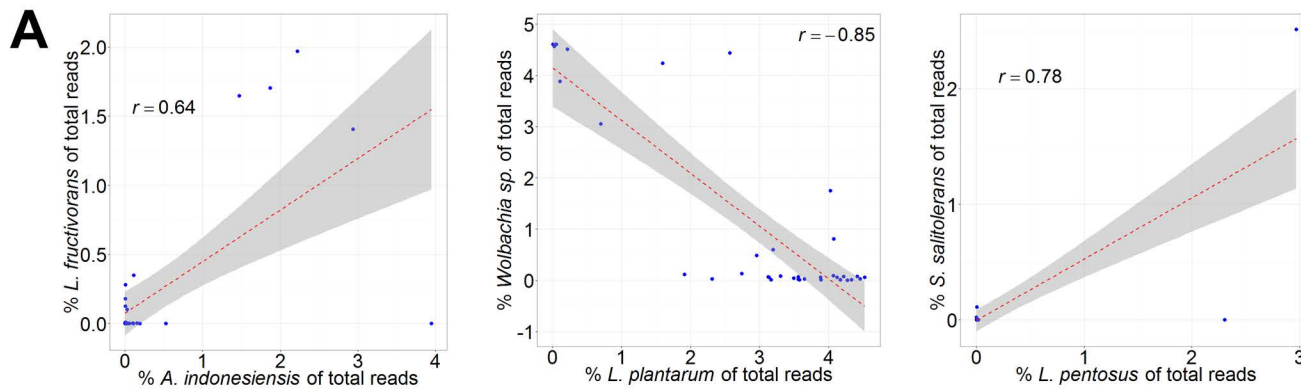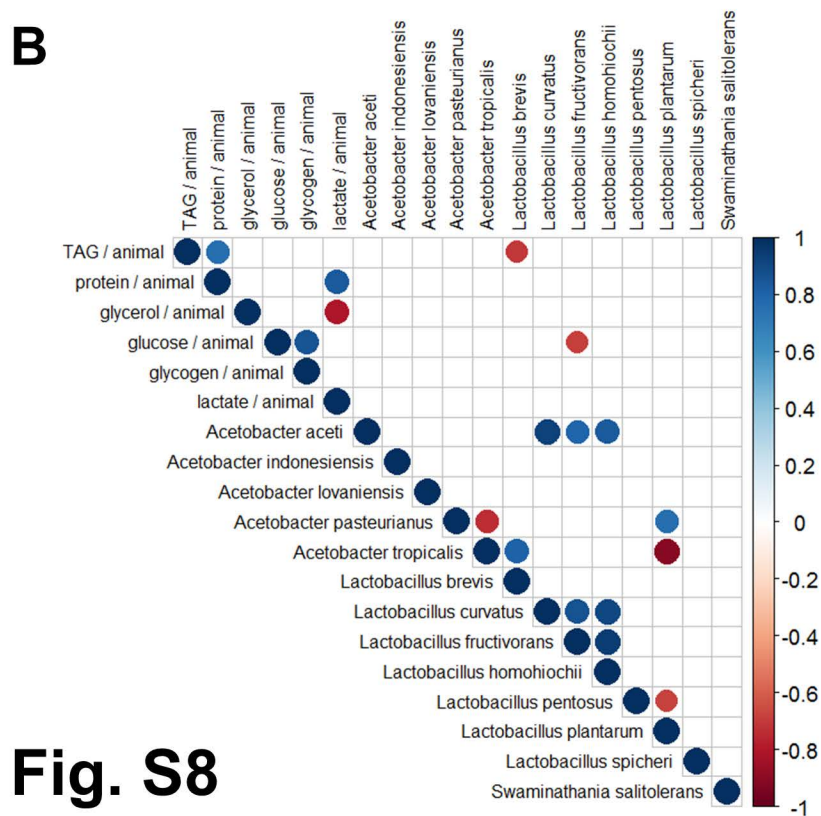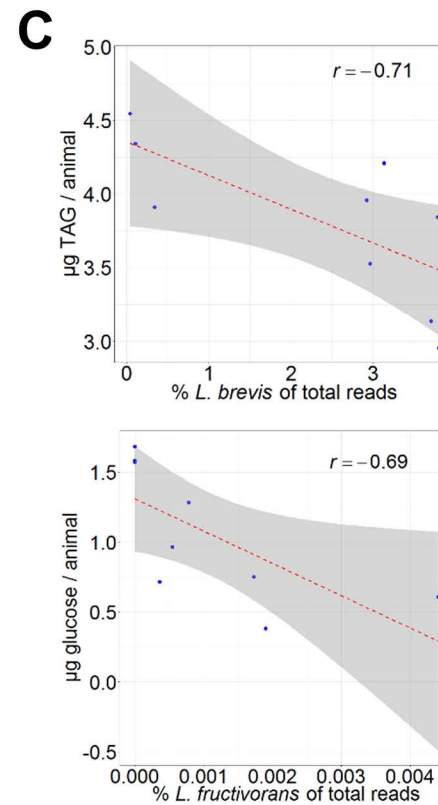

**Fig. S8**
